# Supplementary material for: Genome Organization and Gene Expression Shape the Transposable Element Distribution in the Drosophila melanogaster Euchromatin
Source: PLoS Genet. 2007 Nov 30;3(11):e210. doi: 10.1371/journal.pgen.0030210 (PMC2098804; doi:10.1371/journal.pgen.0030210)
Supplement: Table S1 — (50 KB XLS) [file pgen.0030210.st001.xls]

## Sheet: Table S1
				TRANSCRIPTIONAL TERRITORIES									NON-TRANSCRIPTIONAL TERRITORIES
						germline-	soma-	unknown-							germline-	soma-	unknown-
		canonical				expressed	expressed	expressed		germline	soma				expressed	expressed	expressed		germline	soma
name	class	length		all		genes	genes	genes		intergenic regions	intergenic regions		all		genes	genes	genes		intergenic regions	intergenic regions
INE-1	SINE-like	611		386		50	18	52		128	138		1635		108	197	439		278	613
1360	IR	7545		37		7	1	9		8	12		202		7	20	47		61	67
roo	Retroviral	9092		33		1	8	8		5	11		97		6	7	18		11	55
jockey	non-LTR	5020		31		1	2	3		5	20		63		3	9	13		7	31
Isfun-1-Dfun-like	IR	NA		30		4	3	4		4	15		84		7	12	23		17	25
mini-me-Dpse-like	non-LTR	2908		20		1	3	2		6	8		61		4	8	19		5	25
INE-1-Dbuz-like	IR	NA		15		2	2	1		6	4		61		4	8	23		3	23
ISBu2-Dbuz-like	IR	NA		15		0	2	8		2	3		37		2	3	15		7	10
297	Retroviral	775		13		0	1	2		4	6		51		4	6	9		12	20
TART-Dvir-like	non-LTR	8500		13		2	1	9		0	1		42		6	5	25		3	3
copia	Retroviral	3589		13		0	0	4		2	7		21		2	2	3		9	5
hobo	IR	5695		12		0	1	4		3	4		43		3	2	5		17	16
Doc	non-LTR	5365		11		1	2	1		2	5		48		1	4	14		11	18
F	non-LTR	449		10		1	2	3		1	3		44		3	6	11		11	13
HB	IR	NA		10		0	1	1		7	1		44		3	6	18		4	13
Stalker4	Retroviral	7359		10		0	0	1		0	9		16		0	0	0		14	2
invader3	Retroviral	1365		10		0	0	0		2	8		19		1	0	0		14	4
412	Retroviral	7567		9		0	0	2		0	7		23		0	5	6		5	7
Rt1c	non-LTR	2326		9		0	0	2		1	6		16		1	0	3		7	5
blood	Retroviral	7410		9		1	0	0		3	5		16		0	0	4		2	10
Cr1a	non-LTR	2736		8		1	0	0		5	2		92		5	8	24		17	38
I	non-LTR	4187		8		2	0	2		3	1		29		0	1	8		6	14
S	IR	NA		8		1	1	3		1	2		49		2	1	9		15	22
FB	Foldback	1636		7		1	2	2		0	2		50		4	7	18		8	13
opus	Retroviral	7521		7		0	1	3		3	0		19		1	0	4		4	10
BS	non-LTR	5142		6		0	0	0		1	5		36		0	3	5		7	21
G4	non-LTR	3856		6		0	0	0		3	3		13		0	0	2		7	4
P-T-Damb-like	IR	NA		6		0	0	1		3	2		16		1	1	6		4	4
hopper	IR	122		6		0	1	0		2	3		17		1	3	2		8	3
jockey2	non-LTR	3428		6		0	0	0		2	4		15		1	1	2		1	10
pogo	IR	2121		6		0	0	1		3	2		40		0	7	7		9	17
G5	non-LTR	4060		5		0	0	0		3	2		17		0	0	3		5	9
Rt1b	non-LTR	3366		5		0	2	0		1	2		34		3	1	6		12	12
S2	IR	3446		5		0	0	2		1	2		8		0	0	0		2	6
SGM-Dsub-like	MITE	NA		5		3	0	0		1	1		51		2	5	8		10	26
Tc1	IR	743		5		0	0	1		1	3		17		1	2	6		2	6
diver2	Retroviral	406		5		0	0	1		2	2		19		1	1	5		5	7
gypsy	Retroviral	7469		5		0	1	0		1	3		7		0	0	0		3	4
mdg3	Retroviral	5519		5		0	0	1		1	3		13		2	2	1		6	2
transib2	IR	4303		5		0	0	1		1	3		13		1	1	2		3	6
X	non-LTR	4740		4		0	0	0		0	4		37		1	2	5		11	18
flea	Retroviral	5005		4		0	0	1		1	2		23		1	3	3		7	9
mdg1	Retroviral	7480		4		0	0	2		1	1		32		1	0	9		9	13
17.6	Retroviral	7439		3		0	0	1		1	1		14		0	1	3		2	8
3S18	Retroviral	6127		3		0	0	0		0	3		10		0	0	0		2	8
Bari1-Ddip-like	IR	14282		3		0	0	0		0	3		14		3	0	4		1	6
Quasimodo	Retroviral	12342		3		0	0	2		1	0		19		0	2	1		10	6
R1	non-LTR	373		3		0	0	0		1	2		19		2	1	3		9	4
Stalker2	Retroviral	7672		3		1	0	0		2	0		9		0	0	1		5	3
diver	Retroviral	6112		3		0	0	0		2	1		7		0	0	1		4	2
gypsy12	Retroviral	623		3		0	0	1		0	2		33		0	1	3		10	19
mariner2	IR	912		3		0	0	0		1	2		16		2	2	3		5	4
Galileo-Dbuz-like	Foldback	19326		2		0	1	1		0	0		7		0	1	2		1	3
HMS-Beagle	Retroviral	8845		2		0	0	1		1	0		11		0	2	2		2	5
Ivk	non-LTR	16236		2		0	1	1		0	0		9		0	1	1		3	4
Kepler-Dbuz-like	Foldback	NA		2		1	0	0		0	1		7		0	0	4		1	2
Rt1a	non-LTR	11405		2		0	0	1		0	1		13		1	2	3		4	3
Tabor	Retroviral	14501		2		0	0	0		0	2		3		0	0	0		2	1
Tc1-2	IR	1357		2		0	0	2		0	0		16		0	3	3		3	7
Tc3	IR	4861		2		0	0	0		2	0		13		0	1	6		2	4
Tirant	Retroviral	8526		2		0	1	1		0	0		22		1	1	5		4	11
baggins	non-LTR	2479		2		0	0	2		0	0		23		1	2	2		9	9
gypsy5	Retroviral	7109		2		0	0	0		1	1		4		0	0	0		3	1
invader1	Retroviral	6023		2		0	0	0		2	0		36		0	0	3		27	6
invader2	Retroviral	5351		2		0	0	0		1	1		12		1	0	3		2	6
micropia	Retroviral	10043		2		0	0	0		2	0		9		0	0	1		6	2
rooA	Retroviral	6193		2		0	0	0		2	0		9		3	2	0		2	2
spock-Dmir-like	non-LTR	NA		2		0	1	1		0	0		6		0	1	2		0	3
springer	Retroviral	7583		2		0	0	1		1	0		13		0	0	1		5	7
transib4	IR	4365		2		0	0	0		1	1		4		0	0	0		2	2
1731	Retroviral	406		1		0	0	0		0	1		12		0	0	2		5	5
BS3	non-LTR	286		1		0	0	0		1	0		19		0	1	2		6	10
Bari1	IR	1728		1		0	0	1		0	0		5		0	0	0		2	3
BuT4-Dbuz-like	IR	10294		1		0	0	1		0	0		2		0	0	1		0	1
Burdock	Retroviral	685		1		0	0	0		0	1		16		1	3	4		4	4
Doc3	non-LTR	5543		1		0	0	0		1	0		11		0	0	4		3	4
Fw3	non-LTR	4470		1		0	0	0		0	1		4		0	0	3		0	1
G2	non-LTR	3102		1		0	0	0		0	1		19		1	1	3		9	5
G3	non-LTR	195		1		0	0	0		1	0		4		0	1	0		2	1
G5A	non-LTR	NA		1		0	0	0		0	1		22		1	1	4		3	13
G6	non-LTR	2042		1		0	0	0		1	0		6		0	0	0		4	2
Gandalf-Dkoe-like	IR	NaN		1		0	0	0		0	1		0		0	0	0		0	0
HMS-Beagle2	Retroviral	7220		1		0	0	0		1	0		4		0	0	0		3	1
HeT-A-Dvir-like	non-LTR	6610		1		0	0	0		0	1		6		0	0	1		1	4
Helena	non-LTR	730		1		0	0	0		0	1		7		0	0	1		5	1
Helena-Dvir-like	non-LTR	NA		1		0	0	0		0	1		0		0	0	0		0	0
Idefix	Retroviral	7411		1		0	0	0		0	1		10		0	1	2		3	4
Juan	non-LTR	4236		1		1	0	0		0	0		10		0	0	3		3	4
Max	Retroviral	1924		1		0	0	0		0	1		10		0	0	0		5	5
Minos-Dhyd-like	IR	1795		1		0	0	0		0	1		8		2	0	1		2	3
Penelope-Dvir-like	non-LTR	NaN		1		0	0	1		0	0		23		1	3	6		4	9
Porto1	non-LTR	7424		1		0	0	0		0	1		0		0	0	0		0	0
TRAM-Dmir-like	Retroviral	1605		1		0	0	0		1	0		2		0	0	2		0	0
Transpac	Retroviral	5249		1		0	0	0		1	0		5		0	1	1		1	2
Vege-Dwil-like	MITE	NA		1		0	0	0		1	0		1		0	0	0		0	1
gtwin	Retroviral	7411		1		0	0	0		0	1		14		0	0	2		7	5
gypsy3	Retroviral	6782		1		0	0	0		1	0		7		0	0	2		2	3
gypsy8	Retroviral	NA		1		0	0	0		1	0		26		2	1	4		9	10
invader4	Retroviral	820		1		0	0	0		1	0		9		0	0	1		5	3
worf-Dmir-like	non-LTR	NA		1		0	0	0		0	1		0		0	0	0		0	0
BS4	non-LTR	647		0		0	0	0		0	0		1		0	0	0		0	1
Bari2	IR	1064		0		0	0	0		0	0		5		0	0	3		0	2
BuT1-Dbuz-like	IR	14508		0		0	0	0		0	0		2		0	0	0		1	1
BuT3-Dbuz-like	IR	596		0		0	0	0		0	0		12		0	0	0		8	4
Bungy-Dhyd-like	SINE-like	NaN		0		0	0	0		0	0		2		0	0	0		1	1
Circe	Retroviral	1474		0		0	0	0		0	0		5		0	0	0		3	2
Dm88	Retroviral	3151		0		0	0	0		0	0		29		0	0	1		25	3
Doc2	non-LTR	8184		0		0	0	0		0	0		4		2	0	0		2	0
Doc4	non-LTR	955		0		0	0	0		0	0		6		1	0	1		1	3
Fw2	non-LTR	31364		0		0	0	0		0	0		8		0	1	3		1	3
G	non-LTR	1140		0		0	0	0		0	0		12		1	0	2		6	3
G7	non-LTR	NaN		0		0	0	0		0	0		1		0	0	0		1	0
GATE	Retroviral	13899		0		0	0	0		0	0		12		0	0	1		9	2
HeT-A	non-LTR	6083		0		0	0	0		0	0		2		0	1	0		0	1
HeT-A-Dyak-like	non-LTR	8606		0		0	0	0		0	0		1		0	0	0		1	0
McClintock	Retroviral	13602		0		0	0	0		0	0		3		0	1	0		1	1
NOF	IR	3913		0		0	0	0		0	0		7		1	1	1		3	1
Osvaldo-Dbuz-like	Retroviral	2284		0		0	0	0		0	0		6		0	0	2		2	2
Q	non-LTR	NA		0		0	0	0		0	0		5		1	0	3		1	0
R1-2	non-LTR	35688		0		0	0	0		0	0		2		0	0	1		1	0
Stalker	Retroviral	7256		0		0	0	0		0	0		11		0	0	3		6	2
Stalker3	Retroviral	988		0		0	0	0		0	0		1		0	0	0		0	1
TART-A	non-LTR	13424		0		0	0	0		0	0		4		1	0	1		0	2
TART-B	non-LTR	10654		0		0	0	0		0	0		2		0	0	1		1	0
TART-Dyak-like	non-LTR	NA		0		0	0	0		0	0		2		0	0	1		1	0
Tel-Dvir-like	Retroviral	483		0		0	0	0		0	0		1		0	1	0		0	0
Tom-Dana-like	Retroviral	4756		0		0	0	0		0	0		1		0	0	1		0	0
Tom1	Retroviral	27349		0		0	0	0		0	0		2		0	1	0		1	0
Tv1-Dvir-like	Retroviral	1473		0		0	0	0		0	0		3		0	0	0		3	0
Ulysses-Dvir-like	Retroviral	9274		0		0	0	0		0	0		1		0	0	0		1	0
ZAM	Retroviral	23664		0		0	0	0		0	0		1		0	0	0		1	0
accord	Retroviral	7404		0		0	0	0		0	0		2		0	1	0		0	1
accord2	Retroviral	2435		0		0	0	0		0	0		2		0	0	0		0	2
frogger	Retroviral	3071		0		0	0	0		0	0		2		0	0	1		1	0
gypsy10	Retroviral	NaN		0		0	0	0		0	0		3		0	0	1		2	0
gypsy11	Retroviral	1351		0		0	0	0		0	0		2		0	0	0		1	1
gypsy2	Retroviral	415		0		0	0	0		0	0		4		0	0	1		1	2
gypsy4	Retroviral	6105		0		0	0	0		0	0		10		1	1	2		0	6
gypsy6	Retroviral	1896		0		0	0	0		0	0		12		0	0	1		9	2
gypsy7	Retroviral	14948		0		0	0	0		0	0		3		0	1	1		0	1
gypsy9	Retroviral	2889		0		0	0	0		0	0		6		1	0	1		0	4
hopper2	IR	1637		0		0	0	0		0	0		13		0	1	2		6	4
invader5	Retroviral	8599		0		0	0	0		0	0		2		0	0	1		1	0
invader6	Retroviral	12704		0		0	0	0		0	0		6		0	0	0		3	3
looper1	IR	981		0		0	0	0		0	0		4		0	0	1		2	1
mariner-Dmau-like	IR	1286		0		0	0	0		0	0		1		1	0	0		0	0
ninja-Dsim-like	Retroviral	1958		0		0	0	0		0	0		9		0	0	1		3	5
qbert	NA	1032		0		0	0	0		0	0		2		0	0	0		1	1
rover	Retroviral	7318		0		0	0	0		0	0		7		0	1	1		3	2
transib1	IR	1540		0		0	0	0		0	0		1		0	0	0		1	0
transib3	IR	9135		0		0	0	0		0	0		7		0	1	2		0	4
		total		920		82	59	155		261	363		4142		225	397	977		988	1555
