# Supplementary material for: Genome Organization and Gene Expression Shape the Transposable Element Distribution in the Drosophila melanogaster Euchromatin
Source: PLoS Genet. 2007 Nov 30;3(11):e210. doi: 10.1371/journal.pgen.0030210 (PMC2098804; doi:10.1371/journal.pgen.0030210)
Supplement: Table S4 — In yellow, domains lacking either germline- or soma-expressed genes. In red, domains lacking both germline- and soma-expressed genes. (63 KB XLS) [file pgen.0030210.st004.xls]

## Sheet: Table S4
transcriptional territory ID	chromosome	gene number	all gene length	all intergenic region length	transcriptional territory length	recombination rate	proportion of germline-expressed genes	proportion of soma-expressed genes	TE insertions within genes	TE insertions within intergenic regions
1	2L	4	11188	11633	22821	0	0.5	0	6	6
2	2L	8	105716	3431	109147	3.04041	0.125	0.125	1	0
3	2L	9	95266	83917	179183	2.14318	0.222222	0.222222	0	2
4	2L	9	100815	21686	122501	4.31834	0.444444	0	1	0
5	2L	10	30556	5287	35843	5.03519	0.3	0	3	0
6	2L	10	38108	21622	59730	1.02348	0	0.3	0	0
7	2L	10	143585	27719	171304	0.461936	0.2	0.4	6	0
8	2L	10	37639	2563	40202	0.230968	0.3	0.1	0	0
9	2L	10	50512	5503	56015	3.09179	0.2	0	1	0
10	2L	11	23947	36425	60372	4.36224	0.272727	0.0909091	0	0
11	2L	11	35157	82639	117796	0.602903	0.181818	0.181818	0	3
12	2L	11	89543	96300	185843	4.52967	0.0909091	0.0909091	1	2
13	2L	11	29418	36510	65928	4.31221	0.363636	0.0909091	1	1
14	2L	12	46447	2423	48870	2.57081	0.166667	0	0	0
15	2L	12	67200	72035	139235	3.249	0.333333	0	1	2
16	2L	12	44592	29580	74172	3.11028	0.25	0.25	0	1
17	2L	13	44071	79491	123562	0.44918	0.0769231	0.230769	0	1
18	2L	13	98208	100996	199204	0.461936	0.0769231	0.153846	1	2
19	2L	14	41773	121821	163594	0.716142	0.142857	0.0714286	1	4
20	2L	14	34679	3028	37707	0.716914	0.285714	0	0	0
21	2L	15	77335	102278	179613	3.69964	0.2	0.333333	0	2
22	2L	15	115856	41108	156964	5.29828	0.266667	0.0666667	1	2
23	2L	15	111409	81767	193176	2.91635	0.0666667	0.2	0	1
24	2L	16	67186	162728	229914	3.6595	0.0625	0.0625	1	1
25	2L	16	198394	286217	484611	0.453562	0.125	0.125	4	11
26	2L	17	57952	17391	75343	3.07791	0.235294	0.0588235	1	2
27	2L	17	50264	6809	57073	4.31834	0.235294	0.117647	0	1
28	2L	18	49772	41972	91744	1.70947	0	0.5	0	0
29	2L	18	53985	6659	60644	1.00191	0.277778	0.111111	0	0
30	2L	19	24156	58013	82169	2.91635	0.263158	0.105263	0	1
31	2L	19	70056	279916	349972	0.0243124	0.368421	0.0526316	15	115
32	2L	19	101619	6845	108464	2.7407	0.473684	0.210526	0	0
33	2L	21	49542	250328	299870	2.10243	0.380952	0	0	6
34	2L	21	111756	142948	254704	0.397616	0.333333	0.142857	3	3
35	2L	21	110396	19930	130326	0.230968	0.142857	0.190476	5	3
36	2L	22	106293	130138	236431	2.91635	0.318182	0.0909091	0	2
37	2L	22	50573	6545	57118	7.08083	0.0909091	0.0909091	2	0
38	2L	22	75864	72185	148049	3.84424	0.0454545	0.318182	1	0
39	2L	28	67342	10638	77980	5.40111	0.142857	0.142857	1	0
40	2L	28	179832	113051	292883	3.32623	0.0714286	0.25	0	3
41	2L	29	173955	286699	460654	0.672578	0.172414	0.206897	3	11
42	2L	31	221519	271074	492593	0.757561	0.354839	0	3	10
43	2L	38	172065	89541	261606	3.66352	0.263158	0.184211	1	2
44	2R	7	60768	33909	94677	2.59966	0.285714	0.142857	0	3
45	2R	8	34060	22244	56304	1.85996	0.125	0.25	0	1
46	2R	9	19967	3615	23582	3.692	0.333333	0.111111	0	2
47	2R	9	31414	4971	36385	3.5806	0.111111	0.111111	1	0
48	2R	10	31243	8639	39882	1.57136	0.1	0.2	0	2
49	2R	10	41194	17120	58314	2.59966	0.1	0.3	0	1
50	2R	10	28426	2687	31113	3.70628	0.4	0.2	0	0
51	2R	10	53775	30467	84242	3.65879	0	0.4	0	0
52	2R	10	21095	2599	23694	3.5806	0.3	0	0	0
53	2R	10	58661	4129	62790	4.34157	0.1	0.2	0	0
54	2R	11	25498	7172	32670	0.552989	0.363636	0.181818	1	1
55	2R	11	66065	42218	108283	0.552989	0.0909091	0.181818	1	1
56	2R	11	45937	9889	55826	0.986238	0.0909091	0.272727	0	3
57	2R	11	13382	13102	26484	1.50019	0	0.181818	0	1
58	2R	11	57935	17992	75927	3.12353	0.181818	0	0	0
59	2R	12	41224	60374	101598	2.59966	0.166667	0.0833333	0	3
60	2R	12	178007	60082	238089	2.78851	0.416667	0	5	2
61	2R	12	16392	55874	72266	3.10272	0.333333	0.0833333	0	0
62	2R	12	95620	25252	120872	3.63784	0.166667	0.25	0	0
63	2R	14	22140	16378	38518	2.59966	0.142857	0.0714286	0	3
64	2R	14	62094	50749	112843	4.17369	0.214286	0.142857	0	1
65	2R	14	44906	34449	79355	4.02932	0.214286	0.142857	0	2
66	2R	14	87788	30022	117810	3.13685	0.0714286	0.214286	1	0
67	2R	14	15528	10542	26070	3.17432	0.214286	0.0714286	0	1
68	2R	15	43966	6253	50219	1.2953	0.533333	0.0666667	0	1
69	2R	15	28116	79365	107481	3.4433	0.0666667	0.2	0	1
70	2R	17	43449	52583	96032	3.5806	0.235294	0.117647	0	4
71	2R	18	121523	35668	157191	1.37141	0.277778	0.222222	3	0
72	2R	18	32354	199584	231938	3.13685	0.222222	0.111111	0	6
73	2R	19	31142	20177	51319	1.50019	0.0526316	0	0	2
74	2R	19	34718	117306	152024	3.692	0.210526	0	0	4
75	2R	20	117974	21520	139494	1.20211	0.2	0.1	2	2
76	2R	20	148368	39419	187787	3.692	0.15	0.2	1	0
77	2R	20	35960	148443	184403	3.27639	0.6	0	0	0
78	2R	21	79979	44027	124006	0.943928	0.238095	0.238095	0	2
79	2R	21	69497	152993	222490	4.82379	0.285714	0.142857	0	4
80	2R	22	47826	64544	112370	1.85996	0.5	0	0	0
81	2R	28	76971	12959	89930	3.1392	0.142857	0.142857	0	0
82	2R	32	145110	336618	481728	4.31279	0.125	0.125	1	6
83	2R	36	162619	118146	280765	3.27508	0.194444	0.166667	1	2
84	2R	37	74381	99995	174376	3.12353	0.162162	0.27027	0	2
85	2R	38	135266	167392	302658	3.05231	0.105263	0.184211	0	8
86	2R	41	210465	78642	289107	0.643259	0.146341	0.170732	7	8
87	2R	45	143772	206775	350547	1.1404	0.266667	0.177778	4	16
88	3L	8	36905	2832	39737	0.0534361	0.375	0.25	2	0
89	3L	8	86239	32954	119193	0.026718	0.375	0.125	17	5
90	3L	8	60828	86800	147628	2.95584	0.25	0	1	1
91	3L	9	27158	5351	32509	0.52547	0.222222	0	0	0
92	3L	9	105775	12977	118752	2.39034	0.111111	0.222222	1	0
93	3L	9	61370	35824	97194	2.64357	0	0.111111	0	2
94	3L	9	58174	15381	73555	3.09843	0.111111	0.111111	0	0
95	3L	10	20185	37456	57641	2.45326	0.2	0.2	0	0
96	3L	10	189917	86050	275967	1.03901	0.3	0	2	5
97	3L	10	58523	14123	72646	3.09843	0.4	0	1	0
98	3L	11	67794	4267	72061	1.50096	0.363636	0	1	2
99	3L	11	29898	3113	33011	2.97296	0	0.0909091	1	0
100	3L	11	25011	16260	41271	3.07684	0.181818	0.272727	0	0
101	3L	11	24126	2203	26329	0.950893	0	0.363636	0	0
102	3L	11	36838	3103	39941	3.09843	0.454545	0	0	0
103	3L	12	39902	18913	58815	1.55022	0.0833333	0.166667	0	0
104	3L	12	106291	23514	129805	2.03231	0.25	0.166667	2	0
105	3L	12	38522	108119	146641	1.50096	0.25	0.25	1	0
106	3L	12	55268	16541	71809	1.50096	0.166667	0.25	0	0
107	3L	12	50844	2085	52929	2.34354	0.25	0.166667	0	0
108	3L	12	57890	6751	64641	2.92985	0.0833333	0.416667	0	0
109	3L	12	31690	1965	33655	4.4565	0.166667	0.166667	0	0
110	3L	13	69861	226331	296192	1.89857	0.230769	0.153846	0	1
111	3L	13	114636	81120	195756	3.36538	0.153846	0.0769231	1	0
112	3L	13	55605	42978	98583	0.988773	0.153846	0	1	0
113	3L	13	55999	115554	171553	0.885606	0.0769231	0.307692	1	3
114	3L	14	118606	77498	196104	1.68966	0.214286	0.0714286	1	6
115	3L	14	37091	232659	269750	1.50096	0.214286	0	0	2
116	3L	14	49545	13440	62985	0.52547	0.0714286	0.142857	0	1
117	3L	14	88709	64441	153150	0.0534361	0.285714	0.142857	1	3
118	3L	15	52197	53050	105247	3.14091	0	0.0666667	1	2
119	3L	16	32618	96802	129420	1.89857	0.1875	0.0625	1	4
120	3L	16	70981	18412	89393	2.75203	0	0.125	1	0
121	3L	18	12949	30850	43799	1.44855	0	0.222222	0	2
122	3L	18	53486	210872	264358	3.83473	0.166667	0.0555556	0	4
123	3L	19	63949	74838	138787	1.61663	0	0.263158	1	2
124	3L	19	141158	23096	164254	0.185046	0.263158	0.105263	4	3
125	3L	21	140174	102940	243114	1.40984	0.0952381	0.190476	0	0
126	3L	32	288283	264562	552845	0.026718	0.125	0.09375	2	18
127	3R	9	49320	8017	57337	3.92903	0.222222	0	1	0
128	3R	10	67187	73533	140720	0.392738	0.2	0	3	1
129	3R	10	65535	108929	174464	0.921219	0.2	0.2	0	2
130	3R	10	119919	55326	175245	1.05172	0.2	0.2	0	3
131	3R	10	85078	50478	135556	4.25406	0.1	0.2	1	0
132	3R	10	64848	30638	95486	3.95773	0.1	0.1	0	0
133	3R	10	43932	15823	59755	2.36903	0.3	0.1	0	0
134	3R	11	35225	8437	43662	0.11176	0.545455	0.0909091	5	3
135	3R	11	40469	3536	44005	0.0566649	0.181818	0	0	0
136	3R	11	40912	3985	44897	0.0566649	0	0.0909091	0	2
137	3R	11	57070	1794	58864	0.988858	0.0909091	0.0909091	0	0
138	3R	11	19318	23776	43094	1.05084	0.363636	0	0	0
139	3R	11	21073	21428	42501	2.57138	0.0909091	0.0909091	0	0
140	3R	11	64969	32811	97780	2.87549	0.0909091	0.0909091	0	2
141	3R	11	62227	30887	93114	2.77673	0.181818	0.363636	0	2
142	3R	11	187614	11006	198620	2.65571	0.181818	0.0909091	0	0
143	3R	11	36375	10099	46474	3.74237	0.272727	0.181818	1	0
144	3R	12	54548	34658	89206	0.134577	0.333333	0.0833333	6	5
145	3R	12	33154	28953	62107	0.991274	0.416667	0.0833333	0	0
146	3R	12	23167	33911	57078	0.96695	0.0833333	0.166667	0	0
147	3R	12	82270	27009	109279	0.763953	0.333333	0.0833333	2	0
148	3R	12	31981	21951	53932	3.4401	0.333333	0.0833333	0	0
149	3R	12	97185	6856	104041	2.65571	0.416667	0.0833333	0	2
150	3R	12	66076	25614	91690	4.29853	0.0833333	0.25	0	0
151	3R	12	62379	2666	65045	3.74237	0.166667	0.0833333	0	0
152	3R	12	72595	31248	103843	4.20434	0	0.0833333	0	0
153	3R	12	48811	10376	59187	2.51111	0.166667	0.166667	0	1
154	3R	13	88778	82991	171769	0.96695	0.307692	0.230769	1	1
155	3R	13	16598	12910	29508	1.05084	0.0769231	0.0769231	2	0
156	3R	13	30298	1601	31899	0.561401	0.230769	0.307692	0	0
157	3R	13	67124	124074	191198	0.719031	0.307692	0.0769231	2	0
158	3R	13	97145	52339	149484	2.65571	0	0	3	1
159	3R	13	104759	94036	198795	2.98355	0.0769231	0.153846	3	0
160	3R	13	113434	48086	161520	2.32844	0.0769231	0.230769	0	1
161	3R	14	67070	34060	101130	0.878548	0.0714286	0.285714	0	1
162	3R	14	31579	40378	71957	0.96695	0.142857	0.142857	0	0
163	3R	15	75290	125424	200714	1.05084	0.6	0.0666667	2	0
164	3R	16	64899	55869	120768	2.43935	0.25	0	1	2
165	3R	16	49665	7297	56962	2.65447	0.0625	0.125	0	0
166	3R	18	96625	98150	194775	0.0566649	0.388889	0.111111	6	1
167	3R	18	130550	103653	234203	2.88421	0.222222	0.166667	0	2
168	3R	18	32841	31158	63999	4.05575	0.166667	0.277778	2	0
169	3R	20	83145	117986	201131	0.0625326	0.2	0	8	2
170	3R	22	97051	184083	281134	1.2139	0.0454545	0.136364	4	1
171	3R	22	89771	69997	159768	4.29853	0.272727	0.136364	0	0
172	3R	22	132210	145997	278207	4.26604	0.0454545	0.272727	1	0
173	3R	22	88455	95111	183566	4.05575	0.272727	0	0	2
174	3R	23	129112	249865	378977	2.76486	0.304348	0.217391	4	1
175	3R	24	144510	172028	316538	2.8036	0.0416667	0.125	1	2
176	3R	24	92165	45441	137606	2.68415	0.0833333	0.166667	1	0
177	3R	25	77113	177194	254307	0.0625326	0.16	0.08	11	1
178	3R	29	107284	26716	134000	3.3055	0.103448	0.0689655	1	0
179	3R	30	119585	131503	251088	2.32844	0.333333	0.2	1	1
180	3R	31	116383	136653	253036	2.63426	0.225806	0.0967742	3	3
181	3R	31	211581	149819	361400	2.32844	0.16129	0.290323	3	4
182	3R	35	190133	24776	214909	4.05575	0.171429	0.0857143	1	2
183	3R	39	101061	74941	176002	3.44288	0.0769231	0.102564	0	1
184	X	6	41602	87154	128756	3.44	0	0.166667	1	1
185	X	10	24586	1156	25742	3.68451	0.4	0.1	0	0
186	X	10	76682	61154	137836	4.3958	0	0.4	1	1
187	X	10	38853	54456	93309	4.36459	0.3	0.1	0	0
188	X	10	27294	143759	171053	3.44	0.3	0.1	4	0
189	X	11	45759	19739	65498	5.30568	0.181818	0.0909091	0	0
190	X	11	44979	9338	54317	2.72522	0.0909091	0	0	0
191	X	11	126763	111636	238399	2.90288	0	0.181818	5	1
192	X	12	25017	13563	38580	5.30568	0	0.166667	0	0
193	X	12	34789	129348	164137	3.87763	0.166667	0.0833333	5	0
194	X	12	136769	856	137625	4.09204	0	0.0833333	0	0
195	X	13	42181	20757	62938	1.94542	0.153846	0.0769231	1	3
196	X	13	82276	193104	275380	1.94542	0.153846	0.153846	34	2
197	X	14	97862	33113	130975	0.318605	0.428571	0.357143	5	6
198	X	14	53656	156524	210180	4.64526	0.142857	0.214286	7	2
199	X	14	197980	29376	227356	5.30568	0.214286	0.214286	1	4
200	X	14	37725	4494	42219	2.43665	0.357143	0.142857	0	0
201	X	16	196719	109870	306589	3.0237	0.25	0.1875	5	2
202	X	18	111129	277438	388567	2.97821	0.111111	0.222222	5	1
203	X	18	108048	10777	118825	4.63827	0.0555556	0.166667	0	2
204	X	18	81783	2148	83931	2.64141	0.166667	0.166667	1	0
205	X	19	70192	106130	176322	3.65437	0.105263	0.263158	1	1
206	X	20	104642	125851	230493	3.51591	0	0.35	1	2
207	X	23	73957	189031	262988	0.474585	0.173913	0.130435	4	5
208	X	23	116424	109841	226265	2.95871	0.173913	0.0869565	3	1
209	X	31	111950	77270	189220	0.521414	0.322581	0.16129	2	1
210	X	31	208060	96817	304877	0.864822	0.225806	0.0967742	33	17
211	4	13	113450	68454	181904	0	0.384615	0.0769231	32	49
minimum:		4	11188	856	22821	0	0	0	0	0
maximum:		45	288283	336618	552845	7.08083	0.6	0.5	34	115
sum:		3325	16027689	13833333	29861022	509.143	41.4894	29.5376	367	514
mean:		15.7583	75960.6	65560.8	141521	2.413	0.196632	0.139988	1.73934	2.43602
