# Supplementary material for: Genome Organization and Gene Expression Shape the Transposable Element Distribution in the Drosophila melanogaster Euchromatin
Source: PLoS Genet. 2007 Nov 30;3(11):e210. doi: 10.1371/journal.pgen.0030210 (PMC2098804; doi:10.1371/journal.pgen.0030210)
Supplement: Table S7 — “Neighboring germline expression” is the sum of gene expression in germlines (ovary and testis) for the ten neighbors of a focal gene or intergenic region whereas “local germline expression” is the expression levels of a focal gene or the sum of expression levels of the two flanking genes of a focal intergenic regions. Coefficient signs of the GLM indicate the sign of linear coefficients associated with the terms of the model and hence indicate the direction (positive or negative) in which the different factors affect the number of TE insertions. Parentheses around the sign indicate that the linear coefficients were not significantly different from zero in the model. (20 KB XLS) [file pgen.0030210.st007.xls]

## Sheet: Table S7
	Factors	df	Coefficient sign	F	p(F)	Variance explained
a)	recombination	1	-	1726.67	<0.001	0.173
b)	intergenic or (introns + UTRs) length	1	+	1341.8	<0.001	0.134
c)	proportion of conserved sequences	1	-	147	<0.001	0.015
d)	X vs autosomes	1	-	29	<0.001	0.003
e)	intergenic regions vs genes	1	-	159.3	<0.001	0.016
f)	neighboring germline expression	1	+	163.4	<0.001	0.016
g)	local germline expression	1	(-)	2.05	0.15	0
h)	intergenic regions vs genes : neighboring	1	+	58.9	<0.001	0.002
l)	intergenic regions vs genes : local	1	-	18.4	<0.05	<0.1%
	Total	22275				0.359
